# Supplementary material for: Triple Therapy-Based on Tegoprazan, a New Potassium-Competitive Acid Blocker, for First-Line Treatment of Helicobacter pylori Infection: A Randomized, Double-Blind, Phase III, Clinical Trial
Source: PubMed Central journal article supplement — Gut Liver. 2022 Jul 6;16(4):535–46. doi: 10.5009/gnl220055 (PMC9289827; doi:10.5009/gnl220055), 2022-07-06
Supplement: gnl-16-4-535-supple.pdf [file gnl-16-4-535-supple.pdf]

**Supplementary Table 1.** Demographic and Baseline Characteristics (Per-Protocol Set)

| Characteristics                                | TPZ (n=150) | LPZ (n=150) | p-value            |
|------------------------------------------------|-------------|-------------|--------------------|
| Age, yr                                        | 54.08±11.37 | 53.17±10.61 | 0.476 <sup>‡</sup> |
| Sex                                            |             |             | 0.564 <sup>§</sup> |
| Male                                           | 75 (50.00)  | 70 (46.67)  |                    |
| Female                                         | 75 (50.00)  | 80 (53.33)  |                    |
| Height, cm                                     | 164.63±9.17 | 163.01±8.88 | 0.121 <sup>‡</sup> |
| Weight, kg                                     | 66.19±11.60 | 63.91±12.34 | 0.100 <sup>‡</sup> |
| Smoking                                        |             |             | 0.514 <sup>§</sup> |
| Yes                                            | 24 (16.00)  | 20 (13.33)  |                    |
| No                                             | 126 (84.00) | 130 (86.67) |                    |
| Alcohol drinking                               |             |             | 0.032 <sup>§</sup> |
| Yes                                            | 48 (32.00)  | 66 (44.00)  |                    |
| No                                             | 102 (68.00) | 84 (56.00)  |                    |
| Underlying gastric diseases                    |             |             | 0.703 <sup>§</sup> |
| Peptic ulcer disease                           | 42 (28.00)  | 45 (30.00)  |                    |
| Chronic atrophic gastritis                     | 108 (72.00) | 105 (70.00) |                    |
| CYP2C19 genotype test*                         |             |             | 0.248 <sup>§</sup> |
| Extensive metabolizer                          | 54 (42.52)  | 47 (34.06)  |                    |
| Intermediate metabolizer                       | 61 (48.03)  | 71 (51.45)  |                    |
| Poor metabolizer                               | 12 (9.45)   | 20 (14.49)  |                    |
| Amoxicillin susceptibility <sup>†</sup>        |             |             | 0.272 <sup>§</sup> |
| Susceptible or intermediate (MIC ≤0.125 µg/mL) | 27 (79.41)  | 23 (67.65)  |                    |
| Resistant (MIC >0.125 µg/mL)                   | 7 (20.59)   | 11 (32.35)  |                    |
| Clarithromycin susceptibility <sup>†</sup>     |             |             | 0.787 <sup>§</sup> |
| Susceptible or Intermediate (MIC ≤0.5 µg/mL)   | 25 (73.53)  | 24 (70.59)  |                    |
| Resistant (MIC >0.5 µg/mL)                     | 9 (26.47)   | 10 (29.41)  |                    |

Data are presented as mean±SD or number (%).

TPZ, tegoprazan-based triple therapy; LPZ, lansoprazole-based triple therapy; CYP, cytochrome P450; AMX, amoxicillin; MIC, minimum inhibitory concentration.

\*Only the participants who consented to the genetic test were tested; <sup>†</sup>Only those samples for whom MIC results are available have been presented; <sup>‡</sup>Two-sample t-test; <sup>§</sup>Chi-square test.

**Supplementary Table 2. *Helicobacter pylori* Eradication Rates and Clarithromycin and Amoxicillin Susceptibility (Per-Protocol Set)**

| Variable                                             | AMX-susceptible (MIC ≤0.125 mg/mL) |               |          | AMX-resistant (MIC >0.125 mg/mL) |               |          | AMX total      |               |          |
|------------------------------------------------------|------------------------------------|---------------|----------|----------------------------------|---------------|----------|----------------|---------------|----------|
|                                                      | HP eradication                     | 95% CI        | p-value* | HP eradication                   | 95% CI        | p-value* | HP eradication | 95% CI        | p-value* |
| CLR-susceptible or CLR-intermediate (MIC ≤0.5 µg/mL) |                                    |               |          |                                  |               |          |                |               |          |
| TPZ                                                  | 21/21 (100)                        | -0.05 to 0.16 | 0.462    | 2/4 (50.0)                       | -0.63 to 0.63 | 1.000    | 23/25 (92.0)   | -0.10 to 0.27 | 0.417    |
| LPZ                                                  | 17/18 (94.4)                       |               |          | 3/6 (50.0)                       |               |          | 20/24 (83.3)   |               |          |
| CLR-resistant (MIC >0.5 µg/mL)                       |                                    |               |          |                                  |               |          |                |               |          |
| TPZ                                                  | 1/6 (16.7)                         | -0.76 to 0.29 | 0.546    | 0/3 (0.0)                        | -0.55 to 0.15 | 1.000    | 1/9 (11.1)     | -0.54 to 0.16 | 0.582    |
| LPZ                                                  | 2/5 (40.0)                         |               |          | 1/5 (20.0)                       |               |          | 3/10 (30.0)    |               |          |
| CLR total                                            |                                    |               |          |                                  |               |          |                |               |          |
| TPZ                                                  | 22/27 (81.5)                       | -0.22 to 0.20 | 1.000    | 2/7 (28.6)                       | -0.52 to 0.36 | 1.000    |                |               |          |
| LPZ                                                  | 19/23 (82.6)                       |               |          | 4/11 (36.5)                      |               |          |                |               |          |

Data have been expressed in terms of number of events or as the number of subjects with the percentage in parentheses.

AMX, amoxicillin; MIC, minimum inhibitory concentration; HP, *Helicobacter pylori*; CI, confidence interval; CLR, clarithromycin; TPZ, tegoprazan-based triple therapy; LPZ, lansoprazole-based triple therapy.

apx.

\*Chi-square test or Fisher exact test

**Supplementary Table 3.** *Helicobacter pylori* Eradication Rates According to CYP2C19 Polymorphism (Per-Protocol Set)

|                                               | Extensive metabolizer |            | Intermediate metabolizer |            | Poor metabolizer |            |
|-----------------------------------------------|-----------------------|------------|--------------------------|------------|------------------|------------|
|                                               | TPZ (n=54)            | LPZ (n=47) | TPZ (n=61)               | LPZ (n=71) | TPZ (n=12)       | LPZ (n=20) |
| <i>H. pylori</i> eradicated patients, No. (%) | 37 (68.52)            | 35 (74.47) | 40 (65.57)               | 48 (67.61) | 10 (83.33)       | 12 (60.00) |
| 95% CI for difference from lansoprazole group | -0.24 to 0.12         |            | -0.18 to 0.14            |            | -0.07 to 0.53    |            |
| p-value*                                      | 0.510                 |            | 0.805                    |            | 0.248            |            |

CYP, cytochrome P450; TPZ, tegoprazan-based triple therapy; LPZ, lansoprazole-based triple therapy; CI, confidence interval.

\*Chi-square test or Fisher exact test.

**Supplementary Table 4.** Risk Factors for Unsuccessful *Helicobacter pylori* Eradication, Determined Using Multivariable Analyses

| Covariates                                       | Odds ratio | 95% CI     | p-value |
|--------------------------------------------------|------------|------------|---------|
| Treatment, TPZ (ref. LPZ)                        | 1.02       | 0.24–4.34  | 0.980   |
| Sex, male (ref. female)                          | 0.89       | 0.18–4.35  | 0.881   |
| Age (yr)                                         | 1.01       | 0.94–1.09  | 0.752   |
| Smoking (ref. no smoking)                        | 2.48       | 0.15–41.83 | 0.530   |
| CYP2C19, EM & IM (ref. PM)                       | 0.41       | 0.03–6.15  | 0.521   |
| Resistance to clarithromycin<br>(ref. sensitive) | 0.04       | 0.01–0.19  | <0.001  |

CI, confidence interval; TPZ, tegoprazan-based triple therapy; LPZ, lansoprazole-based triple therapy; CYP, cytochrome P450; EM, extensive metabolizer; IM, intermediate metabolizer; PM, poor metabolizer; ref. reference.

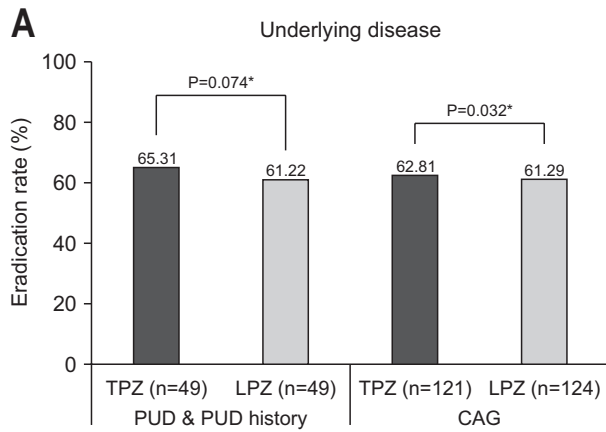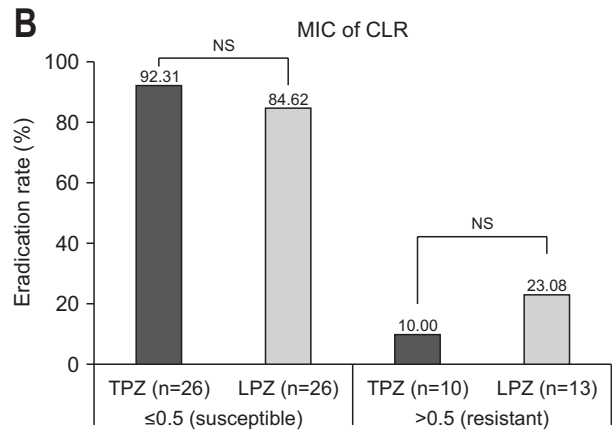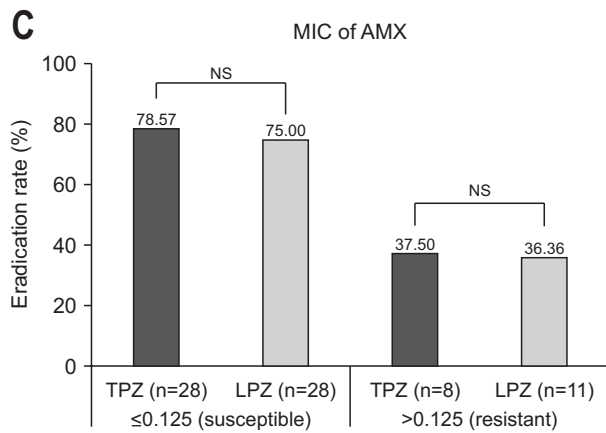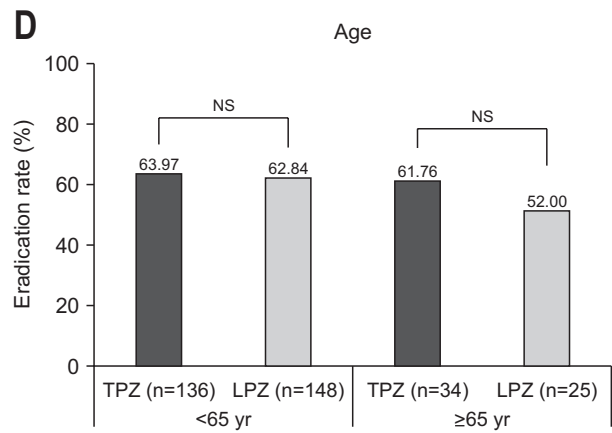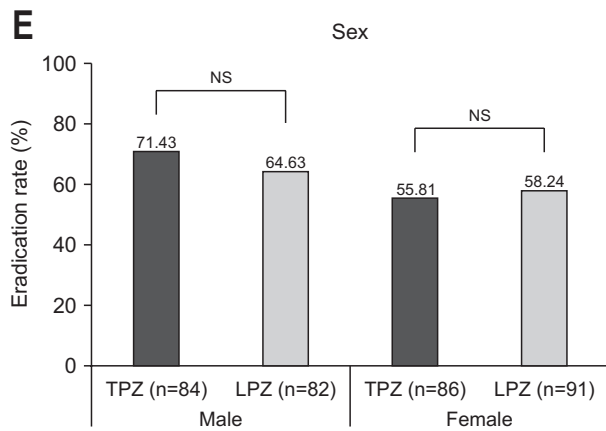

**Supplementary Fig. 1.** *Helicobacter pylori* eradication rates according to underlying gastric disease, minimum inhibitory concentrations of antibiotics, age, and sex in the full-analysis set.

TPZ, tegoprazan-based triple therapy group; LPZ, lansoprazole-based triple therapy group; PUD, peptic ulcer disease; CAG, chronic gastritis; NS, not significant; MIC, minimum inhibitory concentration; CLR, clarithromycin; AMX, amoxicillin.
